# Supplementary material for: Activation of Ca2+-sensing receptor as a protective pathway to reduce Cadmium-induced cytotoxicity in renal proximal tubular cells
Source: PubMed Central journal article supplement (PMC5773512; doi:10.1038/s41598-018-19327-9), 2018-01-18
Supplement: 41598_2018_19327_MOESM1_ESM.pdf [file 41598_2018_19327_MOESM1_ESM.pdf]

**Activation of Ca<sup>2+</sup>-sensing receptor as a protective pathway to reduce Cadmium-induced cytotoxicity in renal proximal tubular cells**

Jie Gu<sup>#1</sup>, Shuya Dai<sup>#1</sup>, Yanmin Liu<sup>1</sup>, Haitao Liu<sup>1</sup>, Yao Zhang<sup>2</sup>, Xingqi Ji<sup>1</sup>, Feng Yu<sup>1</sup>, Yang Zhou<sup>1</sup>, Liang Chen<sup>1</sup>, William Ka Fai Tse<sup>3</sup>, Chris Kong Chu Wong<sup>4</sup>, Binghai Chen<sup>5</sup>, Haifeng Shi<sup>\*1</sup>

<sup>1</sup> Institute of Life Science, Jiangsu University, Zhenjiang, Jiangsu 212000, CHINA,

<sup>2</sup> Medical Section, The Third Affiliated Hospital of Jiangsu University, Zhenjiang, Jiangsu 212000, CHINA,

<sup>3</sup> Faculty of Agriculture, Kyushu University, Fukuoka, JAPAN,

<sup>4</sup> Department of Biology, Hong Kong Baptist University, Hong Kong SAR,

<sup>5</sup> Department of urology, Affiliated Hospital of Jiangsu University, Zhenjiang, Jiangsu, 212000, CHINA,

<sup>#</sup> These authors contributed equally to this work

<sup>\*</sup> Correspondence and requests for materials should be addressed to H.S.

(email:shihf@ujs.edu.cn)

Supplementary

HK-2

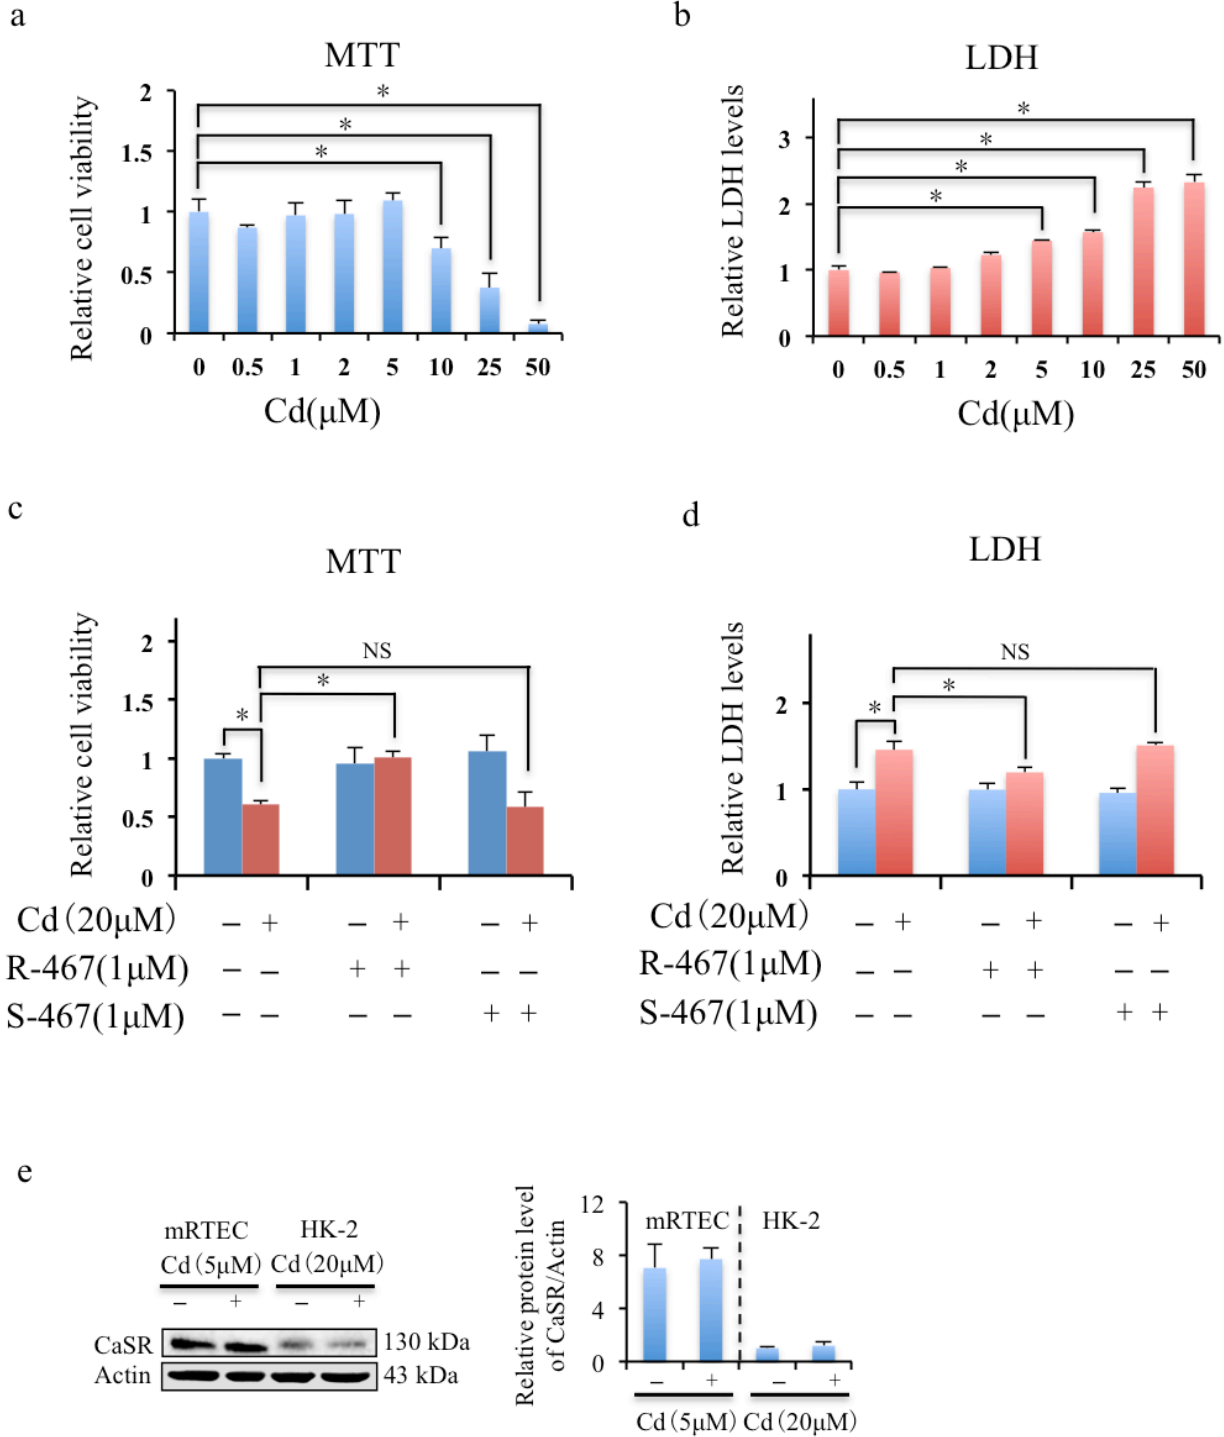

**Fig.1. Cd induced cell death and cytotoxicity in HK-2 cells and effects of Cd on expression of CaSR in renal cells.** (a, b) Cd induced cytotoxicity in HK-2 cells. After treated with 0-20

$\mu\text{M}$  Cd for 24 h, cell viability of HK-2 cells was evaluated by MTT assay. The condition mediums were collected for LDH cytotoxicity assay. Results are presented as mean  $\pm$  SD (n=4). (c, d) Effects of calcimimetics on Cd induced cytotoxicity in HK-2 cells. After treated with Cd (5  $\mu\text{M}$ ), R-467 (1  $\mu\text{M}$ ), S-467 (1  $\mu\text{M}$ ), Cd (5  $\mu\text{M}$ )+R-467 (1  $\mu\text{M}$ ), or Cd (5  $\mu\text{M}$ )+S-467 (1  $\mu\text{M}$ ) for 24 h, cell viability of HK-2 cells was evaluated by MTT assay. The condition mediums were collected for LDH cytotoxicity assay. Results are presented as mean  $\pm$  SD (n=4). \*Statistical significance between control and treatments, or Cd treatment and co-treatment of Cd+R-467, \* $P$ <0.05, using Student's t-test. (e) Western blotting shows effects of Cd on the expressions of CaSR in mRTEC and HK-2 cells.

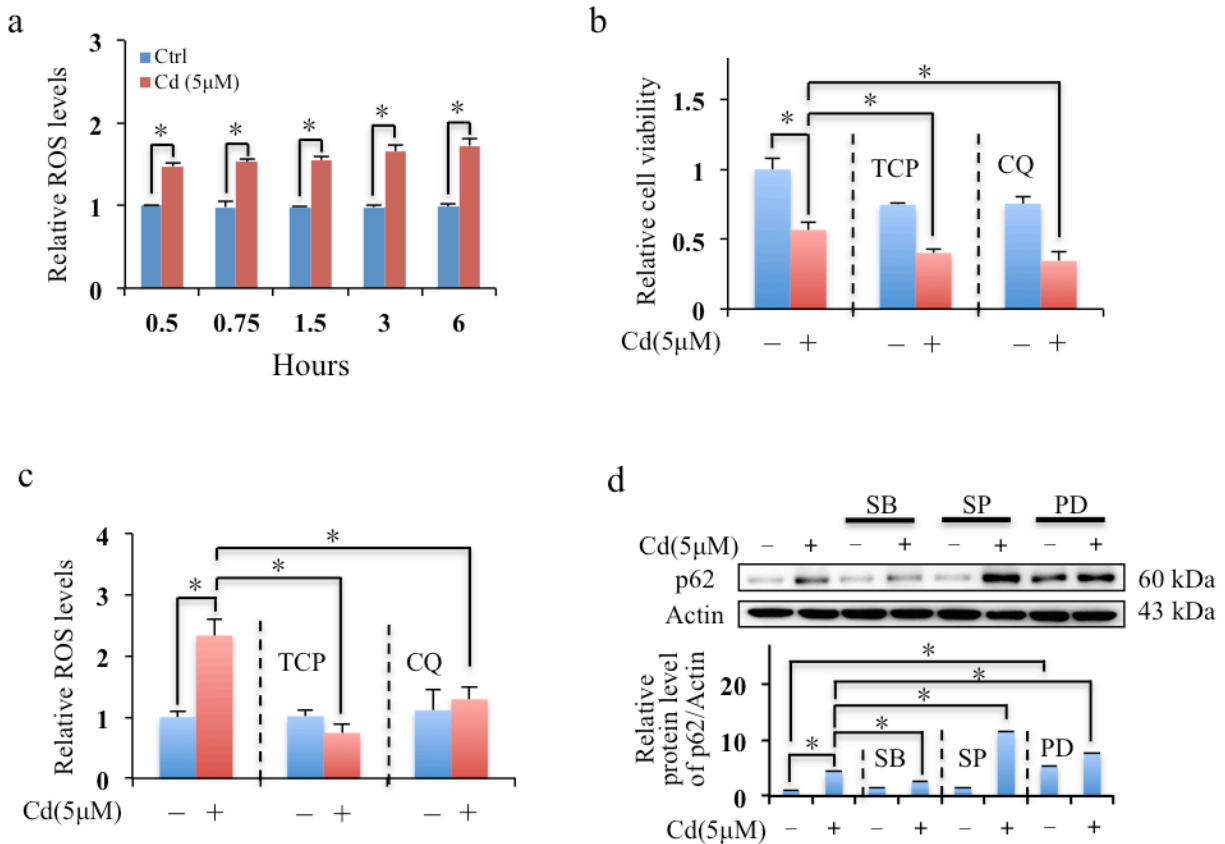

**Fig.2. Effects of Cd on ROS generation, autophagic flux inhibition and apoptosis.** (a) The relative ROS levels in mRTEC cells post-exposed to Cd (5  $\mu\text{M}$ ) for 0.5, 0.75, 1.5, 3 and 6 h. Cd slightly but significantly increased ROS generation in mRTEC cells. Results are presented as mean  $\pm$  SD (n=4). (b, c) Effects of TCP and CQ on Cd induced cell death and ROS generation in mRTEC. Cells pretreated with TCP (100  $\mu\text{M}$ ) or CQ (20  $\mu\text{M}$ ), for 30 min, followed Cd treatment (5  $\mu\text{M}$ ) for 24 h, cell viability was evaluated by MTT assay; or followed Cd treatment (5  $\mu\text{M}$ ) and Cd (5  $\mu\text{M}$ )+R-467 (1  $\mu\text{M}$ ) for 6 h, relative ROS levels in mRTEC cells were determined. TCP and CQ aggravated Cd- induce cell death, but suppressed Cd- induce ROS generation. Results are presented as mean  $\pm$  SD (n=4). (d) Inhibition of MAPK signaling pathway on Cd-regulated p62 expression. Cells pretreated with SB202190 (10  $\mu\text{M}$ ), SP600125 (10  $\mu\text{M}$ ) or PD98059 (10  $\mu\text{M}$ ), for 30 min, followed by Cd treatment (5  $\mu\text{M}$ ) for 24 h, total proteins were

extracted for Western blotting analysis of expression of p62. \*Statistical significance between control and treatments or Cd treatment and in presence of inhibitors or calcimimetics, \*  $P < 0.05$ , using Student's t-test and one-way ANOVA followed by Duncan's multiple range tests.
